# Supplementary material for: Association between Breakfast Consumption and Depressive Symptoms among Chinese College Students: A Cross-Sectional and Prospective Cohort Study
Source: MDPI journal article supplement (doi:10.3390/ijerph17051571), 2020-02-29
Supplement: s1 [file s1]

**Table S1.** Adjusted relationships between breakfast consumption frequency and the risk of depressive symptoms by sex at baseline.

| <i>N</i> = 1060                     | Number of Case | Model 1 <sup>a</sup>           | Model 2 <sup>b</sup> | Model 3 <sup>c</sup> |
|-------------------------------------|----------------|--------------------------------|----------------------|----------------------|
| Men ( <i>n</i> = 103)               |                |                                |                      |                      |
| Categories of breakfast consumption |                |                                |                      |                      |
| ≥6 times/week ( <i>n</i> = 59)      | 4              | 1.000 (reference) <sup>d</sup> | 1.000 (reference)    | 1.000 (reference)    |
| 2–5 times/week ( <i>n</i> = 41)     | 5              | 1.910 (0.480, 7.593)           | 1.955 (0.485, 7.879) | 1.781 (0.366, 8.676) |
| ≤1 time/week ( <i>n</i> = 3)        | 0              | 0.000 (0.000, )                | 0.000 (0.000, )      | 0.000 (0.000, )      |
| <i>p</i> for trend <sup>e</sup>     | -              | 0.575                          | 0.559                | 0.590                |
| Women ( <i>n</i> = 957)             |                |                                |                      |                      |
| Categories of breakfast consumption |                |                                |                      |                      |
| ≥6 times/week ( <i>n</i> = 509)     | 35             | 1.000 (reference) <sup>d</sup> | 1.000 (reference)    | 1.000 (reference)    |
| 2–5 times/week ( <i>n</i> = 403)    | 53             | 2.051 (1.309, 3.212)           | 2.036 (1.299, 3.190) | 1.735 (1.089, 2.766) |
| ≤1 time/week ( <i>n</i> = 45)       | 11             | 4.382 (2.046, 9.384)           | 4.361 (2.034, 9.348) | 3.908 (1.739, 8.781) |
| <i>p</i> for trend <sup>e</sup>     | -              | <0.001                         | <0.001               | 0.001                |

<sup>a</sup> Model 1: Crude. <sup>b</sup> Model 2: Adjusted for age (continuous variable), BMI (≥30 kg/m<sup>2</sup>, ≥25 kg/m<sup>2</sup> and <30 kg/m<sup>2</sup> or not); <sup>c</sup> Model 3: Additionally adjusted for only on child (yes or no), father education (senior high school or less, college or undergraduate), mother education (senior high school or less, college or undergraduate), parent's marital status (married, widowed, divorced), smoking status (regularly, occasionally, never), drinking status (regularly, occasionally, never), PA (≥23 MET·h·week<sup>-1</sup> or not), sleep duration (6–8 h or not), good sleep quality (yes or no). <sup>d</sup> Adjusted data are expressed as odds ratio (95% confidence intervals). <sup>e</sup> *p* for trend were obtained using multivariate logistic regression analyses.

**Table S2.** Adjusted relationships between breakfast consumption frequency and the risk of depressive symptoms incidence by sex during the 1-year follow-up period.

| <i>N</i> = 1060                     | Number of Case | Model 1 <sup>a</sup>           | Model 2 <sup>b</sup>  | Model 3 <sup>c</sup>  |
|-------------------------------------|----------------|--------------------------------|-----------------------|-----------------------|
| Men ( <i>n</i> = 64)                |                |                                |                       |                       |
| Categories of breakfast consumption |                |                                |                       |                       |
| ≥6 times/week ( <i>n</i> = 59)      | 4              | 1.000 (reference) <sup>d</sup> | 1.000 (reference)     | 1.000 (reference)     |
| 2–5 times/week ( <i>n</i> = 41)     | 5              | 2.063 (0.320, 13.313)          | 2.423 (0.365, 16.104) | 1.828 (0.126, 26.510) |
| ≤1 time/week ( <i>n</i> = 3)        | 0              | 0.000 (0.000, )                | 0.000 (0.000, )       | 0.158 (0.000, )       |
| <i>p</i> for trend <sup>e</sup>     | -              | 0.632                          | 0.548                 | 0.658                 |
| Women ( <i>n</i> = 693)             |                |                                |                       |                       |
| Categories of breakfast consumption |                |                                |                       |                       |

|                                  |    |                                |                      |                      |
|----------------------------------|----|--------------------------------|----------------------|----------------------|
| ≥6 times/week ( <i>n</i> = 509)  | 35 | 1.000 (reference) <sup>d</sup> | 1.000 (reference)    | 1.000 (reference)    |
| 2–5 times/week ( <i>n</i> = 403) | 53 | 2.435 (1.424, 4.163)           | 2.442 (1.427, 4.179) | 2.055 (1.176, 3.591) |
| ≤1 time/week ( <i>n</i> = 45)    | 11 | 3.466 (1.207, 9.956)           | 3.457 (1.202, 9.943) | 2.958 (1.005, 8.710) |
| <i>p</i> for trend <sup>e</sup>  | -  | <0.001                         | <0.001               | 0.005                |

<sup>a</sup> Model 1: Crude. <sup>b</sup> Model 2: Adjusted for age (continuous variable), BMI (≥30 kg/m<sup>2</sup>, ≥25 kg/m<sup>2</sup> and <30 kg/m<sup>2</sup> or not); <sup>c</sup> Model 3: Additionally adjusted for only on child (yes or no), father education (senior high school or less, college or undergraduate), mother education (senior high school or less, college or undergraduate), parent's marital status (married, widowed, divorced), smoking status (regularly, occasionally, never), drinking status (regularly, occasionally, never), PA (≥23 MET·h·week<sup>-1</sup> or not), sleep duration (6–8 h or not), good sleep quality (yes or no) and depressive symptoms score at baseline. <sup>d</sup> Adjusted data are expressed as odds ratio (95% confidence intervals). <sup>e</sup> *p* for trend were obtained using multivariate logistic regression analyses.

**Table S3.** Baseline characteristics of participants according to the participants included in and excluded from the analysis.

|                                                 | Excluded Participants<br>( <i>n</i> = 195) | Included Participants<br>( <i>n</i> = 757) | <i>p</i> Value |
|-------------------------------------------------|--------------------------------------------|--------------------------------------------|----------------|
| Sex (female), %                                 | 84.6                                       | 91.5                                       | 0.004          |
| Age, years                                      | 18.7 (18.5, 18.8)                          | 18.6 (18.6, 18.7)                          | 0.877          |
| BMI, %                                          |                                            |                                            |                |
| ≥30 kg/m <sup>2</sup>                           | 15.9                                       | 0.3                                        | <0.001         |
| ≥25 kg/m <sup>2</sup> and <30 kg/m <sup>2</sup> | 6.2                                        | 4.6                                        | 0.381          |
| Smoking status, %                               |                                            |                                            |                |
| Occasionally                                    | 7.7                                        | 5.7                                        | 0.297          |
| Regularly                                       | 1.0                                        | 0.9                                        | 0.897          |
| Drinking status, %                              |                                            |                                            |                |
| Occasionally                                    | 60.0                                       | 52.4                                       | 0.060          |
| Regularly                                       | 1.0                                        | 0.9                                        | 0.897          |
| PA, MET·h·week <sup>-1</sup> (≥23), %           | 70.8                                       | 74.4                                       | 0.309          |
| Sleep duration (6–8 h), %                       | 87.2                                       | 91.9                                       | 0.040          |
| Sleep quality (good), %                         | 75.9                                       | 78.9                                       | 0.371          |
| Father education, %                             |                                            |                                            |                |
| Senior high school or less                      | 89.7                                       | 92.3                                       | 0.240          |
| College                                         | 10.3                                       | 7.3                                        | 0.169          |
| Mother education, %                             |                                            |                                            |                |
| Senior high school or less                      | 0.0                                        | 4.0                                        | 0.448          |
| College                                         | 0.0                                        | 4.0                                        | 0.448          |
| Parent's marital status, %                      |                                            |                                            |                |

---

|                   |      |      |       |
|-------------------|------|------|-------|
| Widowed           | 1.5  | 3.7  | 0.142 |
| Divorced          | 11.8 | 10.7 | 0.662 |
| Only one child, % | 27.2 | 26.4 | 0.830 |

---
